# Supplementary material
Source: MDPI journal article supplement (https://www.mdpi.com/2072-4292/15/24/5701)
Supplement: s1 [file s1]

**Supplementary Materials:**

**Table S1.** Scene names of all Sentinel-1 SAR scenes used in all methods.

| Date         | Scene Name                                                          |
|--------------|---------------------------------------------------------------------|
| 04 June 2019 | S1A_IW_GRDH_1SDV_20190604T095712_20190604T095737_027528_031B3D_71F9 |
| 04 June 2019 | S1A_IW_GRDH_1SDV_20190604T095737_20190604T095758_027528_031B3D_5380 |
| 10 June 2019 | S1B_IW_GRDH_1SDV_20190610T095642_20190610T095711_016632_01F4E3_C994 |
| 16 June 2019 | S1A_IW_GRDH_1SDV_20190616T095737_20190616T095759_027703_032087_4B58 |
| 16 June 2019 | S1A_IW_GRDH_1SDV_20190616T095712_20190616T095737_027703_032087_3F4E |
| 22 June 2019 | S1B_IW_GRDH_1SDV_20190622T095642_20190622T095711_016807_01FA15_4941 |
| 28 June 2019 | S1A_IW_GRDH_1SDV_20190628T095738_20190628T095800_027878_0325BF_CEF9 |
| 28 June 2019 | S1A_IW_GRDH_1SDV_20190628T095713_20190628T095738_027878_0325BF_9800 |
| 04 July 2019 | S1B_IW_GRDH_1SDV_20190704T095643_20190704T095712_016982_01FF43_0D87 |
| 10 July 2019 | S1A_IW_GRDH_1SDV_20190710T095739_20190710T095800_028053_032B11_E71C |
| 10 July 2019 | S1A_IW_GRDH_1SDV_20190710T095714_20190710T095739_028053_032B11_A062 |
